# Supplementary material for: The Moderating Effect of Self-Reported State and Trait Anxiety on the Late Positive Potential to Emotional Faces in 6–11-Year-Old Children
Source: PubMed Central journal article supplement (PMC5826320; doi:10.3389/fpsyg.2018.00125), 2018-02-20
Supplement: Data_Sheet_2.pdf [file Data_Sheet_2.pdf]

## Supplementary material 2

The repeated measures ANOVA with model (model 1, model 2), task period (first half vs. second half) and emotion (Angry, Happy, Neutral) as within-subject factors and ERP amplitude as the dependent measure showed no significant main or interaction effects (in all cases  $F_s < 3.20$  and  $p_s > .08$ ). Specifically, for the occipital P100 there was no significant main effect of task period ( $F(1, 43) = .37, p = .50, \eta^2_p = .009$ ), model ( $F(1, 43) = .08, p = .74, \eta^2_p = .002$ ) or interaction effect ( $F(1, 43) < 0.5, p > .60, \eta^2_p < .01$ ) on amplitude. Similarly, for the occipital N170 there was no significant main effect of task period ( $F(1, 43) = .002, p = .96, \eta^2_p = .001$ ), model ( $F(1, 43) = .13, p = .70, \eta^2_p = .003$ ) or interaction effect ( $F(1, 43) < 0.2, p > .80, \eta^2_p < .007$ ) on amplitude. The pattern of results was the same for the parietal P1 and N170 amplitudes. For the occipital LPP1 there was no significant main effect of task period ( $F(1, 43) = .70, p = .40, \eta^2_p = .01$ ), model ( $F(1, 43) = .24, p = .62, \eta^2_p = .01$ ) and there was a tendency for a model x emotion interaction effect ( $F(1, 43) = 3.00, p = .08, \eta^2_p = .06$ ) on amplitude, indicating a trend for larger LPP1 amplitudes for angry versus neutral for model 1 compared to model 2. This pattern of results was similar for the occipital LPP2. For the parietal LPP1 there was no significant main effect of task period ( $F(1, 43) = 1.00, p = .32, \eta^2_p = .020$ ), model ( $F(1, 43) = .38, p = .54, \eta^2_p = .009$ ) or interaction effect ( $F(1, 43) < 2.80, p > 1.00, \eta^2_p < .06$ ) on amplitude. This pattern of results was similar for the parietal LPP2.
