# Supplementary material for: The Moderating Effect of Self-Reported State and Trait Anxiety on the Late Positive Potential to Emotional Faces in 6–11-Year-Old Children
Source: PubMed Central journal article supplement (PMC5826320; doi:10.3389/fpsyg.2018.00125), 2018-02-20
Supplement: Table_3.pdf [file Table_3.pdf]

### Supplementary material 3

Table S1. Pearson correlations between child-report symptoms of negative affect (depression, trait and state anxiety) with Angry-Neutral and Happy-Neutral P100 and N170 amplitude difference scores in the parietal and occipital region in the right and left hemisphere in the whole sample (n=58).

| Symptoms                | Angry-Neutral |             |              |             | Happy-Neutral |      |             |      |
|-------------------------|---------------|-------------|--------------|-------------|---------------|------|-------------|------|
|                         | Parietal      |             | Occipital    |             | Parietal      |      | Occipital   |      |
|                         | P1            | N170        | P1           | N170        | P1            | N170 | P1          | N170 |
| <b>Right Hemisphere</b> |               |             |              |             |               |      |             |      |
| Trait anxiety           | .02           | .15         | .00          | .14         | -.02          | .01  | -.04        | .12  |
| State anxiety           | <b>.35**</b>  | <b>.33*</b> | <b>.32*</b>  | <b>.23</b>  | .22           | .05  | .22         | -.06 |
| Depression              | .07           | .14         | .05          | .04         | .07           | .07  | .04         | -.05 |
| <b>Left Hemisphere</b>  |               |             |              |             |               |      |             |      |
| Trait anxiety           | .10           | .14         | <b>.26*</b>  | .18         | -.06          | .09  | .04         | -.08 |
| State anxiety           | <b>.38**</b>  | <b>.32*</b> | <b>.40**</b> | <b>.30*</b> | <b>.29*</b>   | .09  | <b>.30*</b> | .23  |
| Depression              | .17           | .16         | <b>.25*</b>  | .15         | .08           | .02  | .06         | .00  |

Note: \*p < .05, \*\*p < .01, \*\*\*p ≤ .001. Associations between the state x trait interaction term and ERPs were non-significant (ps > .06)

Table S2. Pearson correlations between child-report symptoms of negative affect (depression, trait and state anxiety) with Angry-Neutral and Happy-Neutral LPP amplitude difference scores in the parietal and occipital region in the right and left hemisphere in the whole sample (n=58).

| Symptoms                | Angry-Neutral |              |              |              | Happy-Neutral |      |           |      |
|-------------------------|---------------|--------------|--------------|--------------|---------------|------|-----------|------|
|                         | Parietal      |              | Occipital    |              | Parietal      |      | Occipital |      |
|                         | LPP1          | LPP2         | LPP1         | LPP2         | LPP1          | LPP2 | LPP1      | LPP2 |
| <b>Right Hemisphere</b> |               |              |              |              |               |      |           |      |
| Trait anxiety           | .18           | <b>.32*</b>  | .23          | <b>.32*</b>  | .20           | .21  | .23       | .18  |
| State anxiety           | <b>.30*</b>   | <b>.37**</b> | <b>.31*</b>  | <b>.35**</b> | .16           | .18  | .18       | .20  |
| Depression              | .22           | <b>.38**</b> | .23          | <b>.34**</b> | <b>.26*</b>   | .20  | .23       | .16  |
| <b>Left Hemisphere</b>  |               |              |              |              |               |      |           |      |
| Trait anxiety           | .22           | <b>.34*</b>  | <b>.34**</b> | <b>.45**</b> | .17           | .20  | .16       | .17  |
| State anxiety           | <b>.34**</b>  | <b>.35**</b> | <b>.38**</b> | <b>.34**</b> | .18           | .09  | .17       | .05  |
| Depression              | <b>.28*</b>   | <b>.37**</b> | <b>.35**</b> | <b>.43**</b> | .25           | .15  | .13       | .05  |

Note: \*p < .05, \*\*p < .01, \*\*\*p < .001. Associations between the state x trait interaction term and ERPs were non-significant (ps > .08)
